1                    **Sonodynamic therapy as an adjunctive treatment on *porphyromonas gingivalis* induced**  
2                                       **periodontitis in rats with diabetes**

3   Zongshan Ji<sup>a</sup>, Hongbo Zhang<sup>b</sup>, Deshu Zhuang<sup>c,\*</sup>, Yi Zhang<sup>c</sup>, Zheng Hu<sup>d</sup> and Wenwu Cao<sup>d,e</sup>

4

5   <sup>a</sup> *Department of Cadre's ward, The First Hospital of Harbin City, Harbin 150001, China*

6   <sup>b</sup> *Department of Restorative Dentistry, Faculty of Dental Medicine and Graduate School of Dental*

7   *Medicine, Hokkaido University, Sapporo 0600808, Japan*

8   <sup>c</sup> *Department of Stomatology, The Fourth Affiliated Hospital, Harbin Medical University, Harbin*

9   *150001, China*

10  <sup>d</sup> *Condensed Matter Science and Technology Institute, Harbin Institute of Technology, Harbin 150080,*

11 *China*

12  <sup>e</sup> *Department of Mathematics and Materials Research Institute, The Pennsylvania State University,*

13 *University Park, Pennsylvania 16802, USA*

14  \***Corresponding Author:** Deshu Zhuang

15  Address: Department of Stomatology, The Fourth Affiliated Hospital, Harbin Medical University,

16  Harbin, 150001, China

17  Email: [stevenchuang88@126.com](mailto:stevenchuang88@126.com)

18  Tel and fax: 86-451-82576565

19  **Acknowledgements**

20        This study was funded by the Natural Science Foundation, Heilongjiang Province of China (grant

21  number H2017022); National Key Technology Support Program of China (grant number

22  2013BAI03B06).

23 **Abstract**

24 Purpose: The aim of this study was to evaluate the efficacy of sonodynamic therapy (SDT)  
25 *porphyromonas gingivalis* (Pg) induced periodontitis in rats with diabetes.

26 **Methods:** Colony forming unit and the intracellular reactive oxygen species (ROS) of Pg (ATCC  
27 33277) was detected. Periodontal disease was induced by orally administering Pg and placing ligatures  
28 around the cervix of the first maxillary molar. After 4 weeks, the rats were received three treatments:  
29 irrigation with sterile saline solution (control group); scaling and root planing (SRP) (SRP group);  
30 hypodermic injection of 40 µg/mL HMME with 3 W/cm<sup>2</sup> low-intensity ultrasound irradiation every  
31 other day (1 MHz, 600 s) (SRP+SDT group). All rats were euthanized at 10 days postoperatively. The  
32 maxilla was taken for histological examination. The distance between the cemento-enamel junction  
33 (CEJ) and the alveolar bone crest (ABC) was measured to assess the level of alveolar bone.

34 **Results:** When Pg was treated with ultrasound (3 W/cm<sup>2</sup> for 10 min) at 40 µg/mL HMME  
35 concentration, 4.7 lg reduction in CFU in SDT (P<0.01). The intracellular ROS in SDT group had a  
36 significant difference in comparison with the control group (P<0.01). In the D group, the intragroup  
37 analysis revealed less bone loss in the SRP+SDT treatment than in the control and SRP treatment  
38 (P<0.05). Intergroup analysis (ND and D groups) showed a greater bone loss in the ND group treated  
39 with SRP compared to the D group treated with SRP+SDT.

40 **Conclusions:** SDT was an effective adjuvant therapy to SRP on induced periodontitis in rats with  
41 diabetes.

42 **Keywords:** *porphyromonas gingivalis*; periodontitis; diabetes; sonodynamic therapy; alveolar bone  
43 loss.

44 **Introduction**

45 About one-half of the adult population suffers from moderate to severe periodontal diseases that  
46 are also potentially associated with diabetes mellitus [1]. The hyperglycemic environment promotes the  
47 expression of toll-like receptors in periodontal tissues, making diabetic patients more susceptible to  
48 periodontitis [2]. Diabetes mellitus also causes differentiation dysfunction of osteoblasts, and decreased  
49 the density of alveolar bone [3]. Additionally, periodontitis can affect glycemic control in diabetic  
50 patients and induce various diabetic complications [4].

51 *Porphyromonas gingivalis* (Pg), a Gram-negative and obligate anaerobe bacterium, is associated  
52 with many chronic systemic diseases, such as rheumatoid arthritis, cardiovascular diseases, diabetes  
53 mellitus and even cancers [5, 6]. Researchers have found that Pg infection induced the expressions of  
54 TNF- $\alpha$  and IL-6 and might be an important risk factor for diabetes mellitus [7]. Pg, as a periodontal  
55 pathogen, utilizes multiple virulence factors, such as LPS, gingipains, and cytotoxic. These virulence  
56 factors are helpful to breakdown the host-defense mechanisms, damage the connective tissue and cause  
57 the alveolar bone loss around the teeth [8]. According to the systematic and retrospective reviews,  
58 scaling and root planing (SRP) is the main treatment for periodontal disease. It can effectively  
59 eliminate the dental plaque and calculus in 85% of instrumented root surfaces when the periodontal  
60 depth of pockets was 4-6 mm. However, SRP fails to remove the bacterial toxins which hide in the  
61 connective tissue and furcation area [9, 10]. The most common adjunctive therapy of periodontitis is  
62 applying the local or systemic antibiotics. However, considering the large usage of antibiotics during  
63 the therapeutic process, many bacteria may gain resistance, particularly to the tetracyclines by limiting  
64 the drug access to the cell or generating antibiotic enzymes. Moreover, antibiotics may cause some side  
65 effects, such as nausea, xerostomia and stomachache [11].

66 Sonodynamic therapy (SDT) is a promising treatment for killing cancer cells using low-intensity

67 ultrasound with sonosensitizers. When the low-intensity ultrasound reaches the target, it can activate  
68 sonosensitizers and generate reactive oxygen species (ROS) [12]. Hematoporphyrin monomethyl ether  
69 (HMME) is an effective sonosensitizer in SDT with a stable structure, lower dark toxicity, higher  
70 singlet oxygen yield to induce cell apoptosis via the mitochondrial apoptotic pathway [13]. The major  
71 advantages of SDT are its strong penetrating power, noninvasive, no drug resistance and initiation of  
72 activity only when irradiated to ultrasound [14]. Recently, many studies have indicated satisfactory  
73 results with SDT in inhibiting bacteria such as methicillin-resistant *staphylococcus aureus* (MRSA)  
74 [15], *bacillus cereus* and *escherichia coli* [16]. Our previous study showed that HMME-mediated SDT  
75 could effectively inhibit the growth of *staphylococcus aureus* [14]. In addition, HMME combined with  
76 low-intensity ultrasound could effectively alleviate the alveolar bone loss in experimental periodontal  
77 disease in rats [17, 18].

78 Although SDT has been shown effective on various bacteria, sonosensitizer-mediated SDT on Pg  
79 has not been reported up to date. The purpose of this study is to evaluate the effect of HMME-mediated  
80 SDT on Pg and the role of SDT as a repeated adjunctive treatment on experimentally induced  
81 periodontal disease in rats with diabetes. SDT may be an alternative adjunctive treatment for  
82 suppressing the alveolar bone resorption in diabetics who suffer from periodontal disease.

### 83 **Materials and methods**

#### 84 Bacterial strain and culture

85 *Porphyromonas gingivalis* (Pg) strain (ATCC 33277) was cultured in brain-heart infusion (BHI,  
86 Difco, Detroit, MI) broth which supplied with 10 µg/mL hemin (Sigma-Aldrich, USA) and 0.2 µg/mL  
87 vitamin K (Sigma-Aldrich, USA). The bacteria were cultured in a 37 °C anaerobic chamber (5% H<sub>2</sub>,  
88 10%CO<sub>2</sub>, and 85% N<sub>2</sub>). After 5 days, the Pg suspensions were diluted with a sterile saline solution and

89 set to an optical density (OD<sub>630nm</sub>) of approx  $1 \times 10^7$  cells/mL.

90 Animals

91 Fifty-four adult female Wistar rats, weighing 200-250 g, from the Animal Facility of the Second  
92 Affiliated Hospital of Harbin Medical University, were used. Before the study, all rats were allowed to  
93 acclimatize to the laboratory environment for 7 days. This study was approved by the Use Committee  
94 of Harbin Medical University (Harbin, People's Republic of China), in accordance with the National  
95 Institutes of Health guide for the care and use of Laboratory animals (NIH Publications No. 8023,  
96 revised 1978).

97 Induction of diabetic rats

98 After 12 h fasting period, diabetes was induced in half of the animals by an intraperitoneal  
99 injection of 60 mg/kg of streptozotocin (STZ) (Sigma, St. Louis, MO, USA). Other rats were injected  
100 with 0.1 mol/L citrate buffer as control. Diabetes mellitus was confirmed via the caudal vein 48 h after  
101 the STZ administration by the measurement of a blood glucose levels above 300 mg/dL. Blood glucose  
102 levels were recorded before the diabetic induction and at the end of the periodontal treatment.

103 Experimental periodontal disease induction

104 Intraperitoneal anaesthesia was induced by administering ketamine (80 mg/kg) and  
105 dexedetomidine (0.6 mg/kg). The maxillary first molars of each rat received a 3-0 silk ligature around  
106 the cervix to induce experimental periodontal disease. Animals were given sulfamethoxazole (1 mg/mL)  
107 and trimethoprim (200 µg/mL) in their drinking water for 3 days to inhibit the commensal bacteria.  
108 After a 3-day resting period without antibiotics, a 500 µL mixture of 5% carboxymethyl cellulose  
109 sodium and Pg ( $1 \times 10^7$  cells/mL) was orally administered for 3 times, each interval 48 h. After 4 weeks,  
110 ligatures were removed from all animals. The process above was operated by the same experienced

111 operator (Deshu Zhuang). Then the rats in each group (ND and D groups) were randomly received one  
112 of three treatments (6 rats/treatment): irrigation with sterile saline solution (control group); scaling and  
113 root planing (SRP) with a manual curette (13–14 mini-five Gracey curette, Hu-Friedy, USA) through  
114 distal-mesial traction movements in buccal and lingual areas and cervical–occlusal traction movements  
115 in furcation and interproximal areas, then irrigated with 100  $\mu$ L sterile saline solution. (SRP group);  
116 SRP and hypodermic injection of 40  $\mu$ g/mL HMME with 3 W/cm<sup>2</sup> low-intensity ultrasound irradiation  
117 every other day (1 MHz, 600 s) (SRP+SDT group).

118 SDT treatment *in vivo and in vitro*

119 The HMME sterile solution was purchased from Xianhui Pharmaceutical co., Shanghai, People's  
120 Republic of China. The HMME solution was injected into the periodontal tissue between the first and  
121 second maxillary molars using an insulin syringe (1 mL) in dark. The low-intensity ultrasound used in  
122 this study was provided by Harbin Institute of Technology (Harbin, People's Republic of China), with a  
123 frequency of 1.0 MHz, a pulse repetition frequency of 100 Hz and a duty factor of 10%. After 90 min  
124 HMME application, ultrasound was applied to the alveolar bone area between the first and second  
125 maxillary molars with a connection of medical ultrasonic coupling agent. The ultrasound was released  
126 with a diameter of 6 mm and a low intensity of 3 W/cm<sup>2</sup> for 600s every other day, which calibrated  
127 with a hydrophone (Onda Corp., Sunnyvale, CA, USA) in degassed distilled water. All animals were  
128 euthanized after 10 days of periodontal treatment.

129 *In vitro*, the bacteria suspension was cultured in the 96-well plate, and positioned in a water bath  
130 and 5 cm directly away from the ultrasound transducer (diameter 3 cm, resonance frequency 1 MHz,  
131 duty factor 30%, repetition rate 100 Hz). The ultrasound intensity was 3 W/cm<sup>2</sup> as measured by a  
132 needle hydrophone (HNC-1000, Onda Corp., Sunnyvale, CA) inside the well. The Pg suspension was

133 divided into five groups: SDT in different HMME concentration (10-40  $\mu\text{g}/\text{mL}$ ) under 10 min  
134 ultrasonic time, SDT in different ultrasonic time (2-10 min) with 40  $\mu\text{g}/\text{mL}$  HMME, different HMME  
135 concentration (10-40  $\mu\text{g}/\text{mL}$ ) treatment alone with no ultrasound, ultrasound treatment alone in  
136 different ultrasonic time (2-10 min) with no HMME, and the control (no treatment).

137 Colony forming units (CFU) assay

138 After the SDT treatment *in vitro*, all the suspensions were diluted serially ( $10^{-1}$ - $10^{-5}$ ) using the  
139 sterile saline solution. Then cultured in Columbia blood agar (Beijing Land Bridge Technology co.,  
140 LTD, China) in a 37 °C anaerobic chamber (5% H<sub>2</sub>, 10%CO<sub>2</sub>, and 85% N<sub>2</sub>). After 5 days of incubation,  
141 the Pg viability was counted by CFU.

142 Intracellular ROS detection

143 The intracellular ROS was detected by using ROS assay kit (Beyotime Reagent Co., China). 10  
144  $\mu\text{M}$  DCFH-DA was added to the bacteria suspensions for 20 min incubation. The suspensions were  
145 washed three times with sterile saline solution, and the fluorescence intensity of DCFH-DA was  
146 observed under a laser scanning confocal microscope (LSCM) at 488 nm excitation and 525 nm  
147 emission wavelengths. The level of ROS was analyzed using an Image-Pro Plus 6.0 software (Media  
148 cybernetics, USA).

149 Histologic and histometric analysis

150 The maxillas were collected and fixed in paraformaldehyde (10%) for 48h, and then placed in  
151 ethylenediaminetetraacetic acid (EDTA) demineralizing solution for 4 weeks. Paraffin serial sections of  
152 6 $\mu\text{m}$  in mesio-distal direction were obtained and stained with hematoxylin and eosin (H&E), and  
153 photographed using a digital camera attached to a light microscope (Carl Zeiss, Germany). The linear  
154 distance from the CEJ to ABC in the alveolar bone area between the first and second maxillary molars

155 was measured by an image analysis software (ImageJ, Version 1.51r, National Institute of Health,  
156 USA).

#### 157 Statistical analysis

158 The histometric data were statistically analyzed using SPSS 22.0 software, and expressed as the  
159 mean  $\pm$  standard deviation. In vitro, the differences of interblock were performed with a one-way  
160 analysis of variance (ANOVA). After the in vivo experiment, the intragroup and interblock were  
161 analyzed with a two-way ANOVA followed by Tukey's test. The statistical significance was set at  
162  $P < 0.05$ .

### 163 Results

#### 164 CFU counting

165 The antibacterial efficiency of HMME-mediated SDT on Pg was showed by the CFU/mL counts.  
166 As shown in Fig. 1, after the SDT treatment, the growth of Pg decreased when the HMME  
167 concentration increased from 10 to 40  $\mu\text{g/mL}$  with 3  $\text{W/cm}^2$  ultrasonic intensity for 10 min. And 4.7 lg  
168 reduction in CFU When HMME concentration reached 40  $\mu\text{g/mL}$  ( $P < 0.01$ ). But there was no  
169 significant effect when treated HMME alone in different concentration ( $P > 0.05$ ). As the ultrasound  
170 irradiation time increased after SDT treatment, the growth of Pg decreased rapidly (Fig. 2). There was  
171 also no significant effect when treated ultrasound alone in 2 and 4 min ultrasonic time. However, when  
172 the ultrasound irradiation time increased at 6 min, the growth of Pg reduced to 6.1 lg ( $P < 0.01$ ). And 1.5  
173 lg reduction in CFU when the ultrasonic time was 10 min ( $P < 0.01$ ). In Fig. 3, when Pg was treated with  
174 ultrasound (3  $\text{W/cm}^2$  for 10 min) at 40  $\mu\text{g/mL}$  HMME concentration, the number of CFU decreased 4.7  
175 lg compared to the control group ( $P < 0.01$ ).

#### 176 Production of intracellular ROS



177 The intracellular ROS was observed using a ROS fluorescence probe DCFH-DA by LSCM. As  
178 shown in Fig. 4, the fluorescence was present a large number of cells in the SDT group, and a part of  
179 cells in the ultrasound alone group, but a few cells in the control and HMME alone group. Furthermore,  
180 the intensity of fluorescence in SDT and ultrasound alone group had a significant difference in  
181 comparison with the control group in Fig. 5 ( $P<0.01$ ).

#### 182 Blood glucose

183 As shown in Table 1, there was no significant difference in blood glucose level among the animal  
184 in ND group at all experimental periods. After the STZ administration, the blood glucose level in D  
185 group presented a significant difference compared to the initial of diabetic induction.

#### 186 Histological analysis

187 Most specimens in ND and D control groups showed disordered connective tissue with intense  
188 inflammatory infiltrate and areas of bone resorption. In ND SRP group, there was organized bone with  
189 thin bone trabeculae in Fig 6. And specimens in D SRP group demonstrated connective tissue with  
190 scattered mild inflammatory infiltrate and bone resorption. At 10 days post-treatment, there was no  
191 inflammatory infiltrate in the well-developed connective tissue in the ND and D SRP+SDT groups. The  
192 bone trabeculae were thick and the cementum areas presented normally without resorption.

#### 193 Alveolar bone loss

194 In the D group, Intragroup analysis revealed less bone loss in the SRP treatment compared to  
195 control treatment in Table 1 ( $P<0.05$ ). However, there was no significant bone loss between SRP  
196 treatment and control treatment in the ND group ( $P>0.05$ ). Both ND and D groups assessment  
197 demonstrated less bone loss in the SRP+SDT treatment than in the control and SRP treatment ( $P<0.05$ ).  
198 Intergroup analysis (ND and D groups) showed greater bone loss in the ND group treated with SRP

199 compared to the D group treated with SRP+SDT.

## 200 **Discussion**

201 *Pg*, as the major pathogenic microorganism, plays an important role in promoting the  
202 development and progression of periodontal disease [8]. Previous studies have reported that HMME  
203 combined with laser or ultrasound has an antimicrobial effect on whether Gram-positive or  
204 Gram-negative bacteria, such as MRSA, *Escherichia coli* and even supragingival plaque [15, 16, 11].  
205 In our previous study, HMME-mediated SDT could effectively kill more than 95% of *Staphylococcus*  
206 *aureus* [14]. In the present study *in vitro*, the number of *Pg* CFU decreased 4.7 lg compared to the  
207 control group, when treated by HMME (40 µg/mL)-mediated SDT in Fig. 3. Sun et al. [11]  
208 demonstrated that higher HMME concentration led to a stronger antimicrobial effect. Our results  
209 showed that the CFU of *Pg* decreased when increased the HMME concentration from 10 to 40 µg/mL  
210 in SDT. Furthermore, for same HMME concentration, the antimicrobial effect of SDT depends on the  
211 ultrasonic time. When the ultrasonic time increased from 2 to 10 min, the growth of *Pg* reduced 4.3 lg  
212 ( $P<0.01$ ). The *Pg* suspension that received ultrasound alone treatment showed CFU reduction when the  
213 ultrasonic time rises to 6 min. Such observation is probably due to the effective antimicrobial action of  
214 ultrasound, as the previous study mentioned [14].

215 ROS, a general term of oxygen-containing free radicals and peroxides, is related to oxygen  
216 metabolism in bacteria [19]. In normal conditions, the production and elimination of ROS in cells are  
217 balanced. ROS can activate cellular transcription factors and promote the cell proliferation and  
218 differentiation, when it is at a low concentration. However, overproduction of ROS is more reactive  
219 than non-free radicals and easily reacts with other molecules, resulting in cell membrane lipid  
220 peroxidation, protein and DNA damage [20]. Previous studies have reported that the mechanism of

221 SDT in cancer cells apoptosis was thought to be induced by acoustic cavitation [12, 21].  
222 Sonosensitizers are highly sensitive and selective to metabolically active cells. When ultrasound  
223 irradiates the cells, microbubbles in the liquid are formed and catastrophically implode, then excite the  
224 sonosensitizer to produced the excessive ROS, which irreversibly damages the cell cytoplasmic  
225 membrane, mitochondrial proteins, and eventually eradicate cells [22]. In the present study, the changes  
226 of intracellular ROS fluorescence level in four groups were observed by LSCM. Compare to the  
227 control group, the ROS fluorescence is significantly enhanced in the SDT group. These findings  
228 demonstrated that ROS was excessively generated during the HMME-mediated SDT treatment, and  
229 might be necessary to induce the antibacterial effect.

230 Our present in vivo study evaluated the efficacy of HMME-mediated SDT on Pg induced  
231 experimental periodontal disease in rats with diabetes. STZ was used to damage the pancreas  $\beta$  cells to  
232 change the pancreatic function in secretion. After the STZ administration 48 h, the blood glucose level  
233 in D group presented a significant difference compare to the initial of diabetic induction. The diabetes  
234 may increased the severity of periodontitis, and the bone loss in D group was higher than the ND group  
235 ( $P < 0.05$ ), which is in agreement with Aral et al. who evaluated bone loss both in induced-periodontitis  
236 and periodontitis with diabetes [23]. Furthermore, diabetes could increase oxidative stress, change the  
237 accumulation of advanced glycation end products, and activate inflammatory cytokine release [24]. It  
238 also enhanced alveolar bone resorption and decreased the number of osteoblasts and periodontal  
239 ligament fibroblasts [25].

240 Our previous studies demonstrated that HMME mediated SDT could effectively suppress the  
241 alveolar bone resorption [17]. This study compared the influence of SDT as an adjunctive treatment on  
242 Pg induced periodontitis in rats with diabetes. The histometric analysis showed that whether in ND or

243 in D group, less bone loss was presented in the SRP+SDT treatment than in the control and SRP  
244 treatment ( $P<0.05$ ). In addition, intergroup analysis (ND and D groups) showed less bone loss in the D  
245 group treated with SRP+SDT compared to the ND group treated with SRP. This could be explained by  
246 the ability of ultrasound to promote angiogenesis and collagen synthesis in damaged areas [26, 27]. Gu  
247 XQ et al. found that low-intensity pulsed ultrasound could facilitate the calcium salt deposition as well  
248 as new bone maturation [28]. Another explanation might be the antibacterial activity of SDT. Studies  
249 have indicated that SDT could generate ROS, which effectively damages the bacterial membrane,  
250 protein and DNA [29]. Thus, it might restrain the bacterial colonization, alleviate the periodontium  
251 inflammation and enhance the tissue healing.

## 252 **Conclusions**

253 In summary, our present study demonstrates HMME-mediated SDT has a remarkable antibacterial  
254 effect on Pg *in vivo* and *in vitro*. The excessive generation of ROS might be a crucial part of the  
255 antimicrobial mechanism of SDT. In addition, the results indicated that HMME-mediated SDT might  
256 be a promising complementary method for treating periodontal diseases.

## 257 **Funding**

258 This study was funded by the Natural Science Foundation, Heilongjiang Province of China (grant  
259 number H2017022); National Key Technology Support Program of China (grant number  
260 2013BAI03B06).

## 261 **Conflict of Interest**

262 The authors declare that they have no conflict of interest.

## 263 **Ethical approval**

264 All applicable international, national, and/or institutional guidelines for the care and use of

265 animals were followed.

## 266 **Informed consent**

267 Informed consent was obtained from all individual participants included in the study.

## 268 **References**

269 [1] Oberoi SS, Harish Y, Hiremath S, Puranik M (2016) A cross-sectional survey to study the  
270 relationship of periodontal disease with cardiovascular disease, respiratory disease, and diabetes  
271 mellitus. *J Indian Soc Periodontol* 20(4):446-452. doi: 10.4103/0972-124X.186946.

272 [2] Promsudthi A, Poomsawat S, Limsricharoen W (2014) The role of Toll-like receptor 2 and 4 in  
273 gingival tissues of chronic periodontitis subjects with type 2 diabetes. *J Periodontal Res* 49(3):346-54.  
274 doi: 10.1111/jre.12112.

275 [3] Kim JH, Lee DE, Woo GH, Cha JH, Bak EJ, Yoo YJ (2015) Osteocytic sclerostin expression in  
276 alveolar bone in rats with diabetes mellitus and ligature-induced periodontitis. *J Periodontol*  
277 86(8):1005-11. doi: 10.1902/jop.2015.150083.

278 [4] Miranda TS, Feres M, Retamal-Valdés B, Perez-Chaparro PJ, Maciel SS, Duarte PM (2017)  
279 Influence of glycemic control on the levels of subgingival periodontal pathogens in patients with  
280 generalized chronic periodontitis and type 2 diabetes. *J Appl Oral Sci* 25(1):82-89. doi:  
281 10.1590/1678-77572016-0302.

282 [5] Jeong E, Lee JY, Kim SJ, Choi J (2012) Predominant immunoreactivity of *Porphyromonas*  
283 *gingivalis* heat shock protein in autoimmune diseases. *J Periodontal Res* 47(6):811-6. doi:  
284 10.1111/j.1600-0765.2012.01501.x.

285 [6] Peters BA, Wu J, Pei Z, Yang L, Purdue MP, Freedman ND, Jacobs EJ, Gapstur SM, Hayes RB,  
286 Ahn J (2017) Oral Microbiome Composition Reflects Prospective Risk for Esophageal Cancers. *Cancer*

- 287 Res 77(23):6777-6787. doi: 10.1158/0008-5472.
- 288 [7] Kang W, Wang T, Hu Z, Liu F, Sun Y, Ge S (2017) Metformin inhibits *Porphyromonas gingivalis*  
289 lipopolysaccharide-influenced inflammatory response in human gingival fibroblasts via regulating  
290 activating transcription factor-3 expression. J Periodontol 88(10):e169-e178. doi:  
291 10.1902/jop.2017.170168.
- 292 [8] Zhou W, Zhang X, Zhu CL, He ZY, Liang JP, Song ZC (2016) Melatonin receptor agonists as the  
293 "Perioceutics" agents for periodontal disease through modulation of *Porphyromonas gingivalis*  
294 virulence and inflammatory response. PLoS One 11(11):e0166442. doi: 10.1371/journal.pone.0166442.
- 295 [9] Assem NZ, Alves MLF, Lopes AB, Gualberto EC Junior, Garcia VG, Theodoro LH (2017)  
296 Antibiotic therapy as an adjunct to scaling and root planing in smokers: a systematic review and  
297 meta-analysis. Braz Oral Res 31:e67. doi: 10.1590/1807-3107BOR-2017.vol31.0067.
- 298 [10] Monje A, Kramp AR, Criado E, Suárez-López Del Amo F, Garaicoa-Pazmiño C, Gargallo-Albiol  
299 J, Wang HL (2016) Effect of periodontal dressing on non-surgical periodontal treatment outcomes: a  
300 systematic review. Int J Dent Hyg 14(3):161-7. doi: 10.1111/idh.12130.
- 301 [11] Sun Y, Xing D, Shen L, Sun M, Fang M, Bi L, Sui Y, Zhang Z, Cao W (2013) Bactericidal effects  
302 of hematoporphyrin monomethyl ether-mediated photosensitization against pathogenic communities  
303 from supragingival plaque. Appl Microbiol Biotechnol 97(11):5079-87. doi:  
304 10.1007/s00253-013-4903-0.
- 305 [12] Bilmin K, Kujawska T, Secomski W, Nowicki A, Grieb P (2016) 5-Aminolevulinic acid-mediated  
306 sonosensitization of rat RG2 glioma cells in vitro. Folia Neuropathol 54(3):234-240.
- 307 [13] Su X, Wang P, Wang X, Cao B, Li L, Liu Q (2013) Apoptosis of U937 cells induced by  
308 hematoporphyrin monomethyl ether-mediated sonodynamic action. Cancer Biother Radiopharm

- 309 28(3):207-17. doi: 10.1089/cbr.2012.1190.
- 310 [14] Zhuang D, Hou C, Bi L, Han J, Hao Y, Cao W, Zhou Q (2014) Sonodynamic effects of  
311 hematoporphyrin monomethyl ether on *Staphylococcus aureus* in vitro. FEMS Microbiol Lett  
312 361(2):174-80. doi: 10.1111/1574-6968.12628.
- 313 [15] Wang X, Ip M, Leung AW, Wang P, Zhang H, Hua H, Xu C (2016) Sonodynamic action of  
314 hypocrellin B on methicillin-resistant *Staphylococcus aureus*. Ultrasonics 65:137-44. doi:  
315 10.1016/j.ultras.2015.10.008.
- 316 [16] Wang X, Ip M, Leung AW, Yang Z, Wang P, Zhang B, Ip S, Xu C (2015) Sonodynamic action of  
317 curcumin on foodborne bacteria *Bacillus cereus* and *Escherichia coli*. Ultrasonics 62:75-9. doi:  
318 10.1016/j.ultras.2015.05.003.
- 319 [17] Zhuang D, Han J, Bi L, Wang Y, Hao Y, Zhou Q, Cao W (2015) Sonodynamic effect of  
320 hematoporphyrin monomethyl ether on ligature-induced periodontitis in rats. Drug Des Devel Ther  
321 9:2545-51. doi: 10.2147/DDDT.S82347.
- 322 [18] Zhuang D, Ji Z, Bi L, Wang X, Zhou Q, Cao W (2016) Low-intensity ultrasound combined with  
323 hematoporphyrin monomethyl ether in the treatment of experimental periodontitis in rats. Biomed Res  
324 Int 2016:7156716.
- 325 [19] Becerra MC, Albesa I (2002) Oxidative stress induced by ciprofloxacin in *Staphylococcus aureus*.  
326 Biochem Biophys Res Commun 297(4):1003-7.
- 327 [20] Trachootham D, Lu W, Ogasawara MA, Nilsa RD, Huang P. Redox regulation of cell survival.  
328 Antioxid Redox Signal 2008;10(8):1343-74. doi: 10.1089/ars.2007.1957.
- 329 [21] Shanei A, Sazgarnia A, Tayyebi Meibodi N, Eshghi H, Hassanzadeh-Khayyat M, Esmaily H,  
330 Attaran Kakhki N (2012) Sonodynamic therapy using protoporphyrin IX conjugated to gold

- 331 nanoparticles: an in vivo study on a colon tumor model. *Iran J Basic Med Sci* 15(2):759-67.
- 332 [22] Shibaguchi H, Tsuru H, Kuroki M, Kuroki M (2011) Sonodynamic cancer therapy: a non-invasive  
333 and repeatable approach using low-intensity ultrasound with a sonosensitizer. *Anticancer Res*  
334 31(7):2425-9.
- 335 [23] Aral CA, Kesim S, Greenwell H, Kara M, Cetin A, Yakan B (2015) Alveolar bone protective and  
336 hypoglycemic effects of systemic propolis treatment in experimental periodontitis and diabetes mellitus.  
337 *J Med Food* 18(2):195-201.
- 338 [24] Liu R, Bal HS, Desta T, Krothapalli N, Alyassi M, Luan Q, Graves DT (2006) Diabetes enhances  
339 periodontal bone loss through enhanced resorption and diminished bone formation. *J Dent Res*  
340 85(6):510-4.
- 341 [25] Grauballe MB, Belstrom D, Ostergaard JA, Paster BJ, Schou S, Flyvbjerg A, Holmstrup P (2017)  
342 Ligature-associated bacterial profiles are linked to type 2 diabetes mellitus in a rat model and  
343 influenced by antibody treatment against TNF- $\alpha$  or RAGE. *Clin Exp Dent Res* 3(1):25-31.
- 344 [26] Mu HM, Wang LY (2015) Effect of therapeutic ultrasound on brain angiogenesis following  
345 intracerebral hemorrhage in rats. *Microvasc Res* 102:11-8. doi: 10.1016/j.mvr.2015.08.001.
- 346 [27] Fantinati MS, Mendonça DE, Fantinati AM, Santos BF, Reis JC, Afonso CL, Vinaud MC, Lino  
347 Rde S Júnior (2016) Low intensity ultrasound therapy induces angiogenesis and persistent  
348 inflammation in the chronic phase of the healing process of third degree burn wounds experimentally  
349 induced in diabetic and non-diabetic rats. *Acta Cir Bras* 31(7):463-71. doi:  
350 10.1590/S0102-865020160070000006.
- 351 [28] Gu XQ, Li YM, Guo J, Zhang LH, Li D, Gai XD (2014) Effect of low intensity pulsed ultrasound  
352 on repairing the periodontal bone of Beagle canines. *Asian Pac J Trop Med* 7(4):325-8. doi:



353 10.1016/S1995-7645(14)60049-3.

354 [29] Costley D, Nesbitt H, Ternan N, Dooley J, Huang YY, Hamblin MR, McHale AP, Callan JF (2017)

355 Sonodynamic inactivation of Gram-positive and Gram-negative bacteria using a Rose

356 Bengal-antimicrobial peptide conjugate. *Int J Antimicrob Agents* 49(1):31-36. doi:

357 10.1016/j.ijantimicag.2016.09.034.

358 **Figures and illustrations**

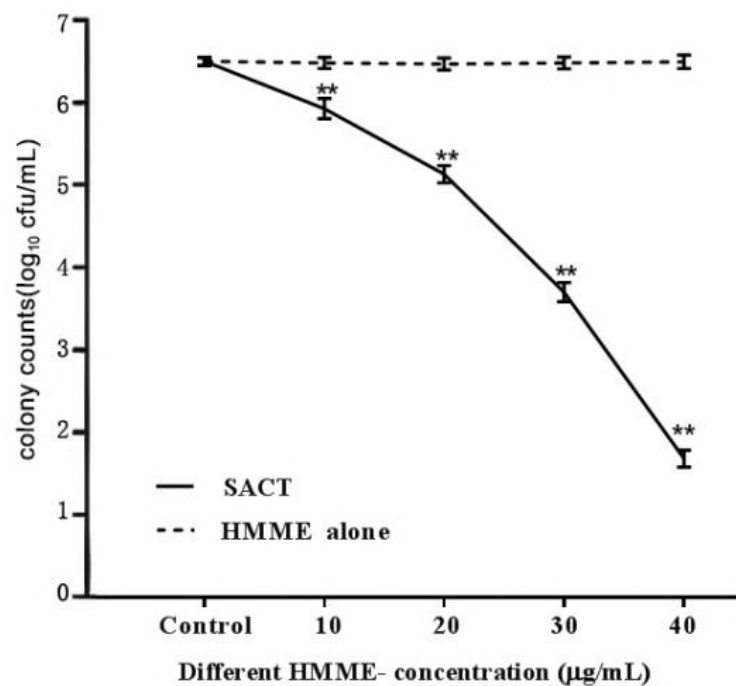

359

360 **Fig.1** Reduction in CFU after SDT with variation of HMME concentration on Pg. HMME

361 concentration ranged from 10 to 40 µg/ml were used in combination with a ultrasound intensity of

362 3 W/cm<sup>2</sup>. Data represent mean values (n=10), and error bars represent standard deviations. \*\*P

363 <0.01 compared with the control group.

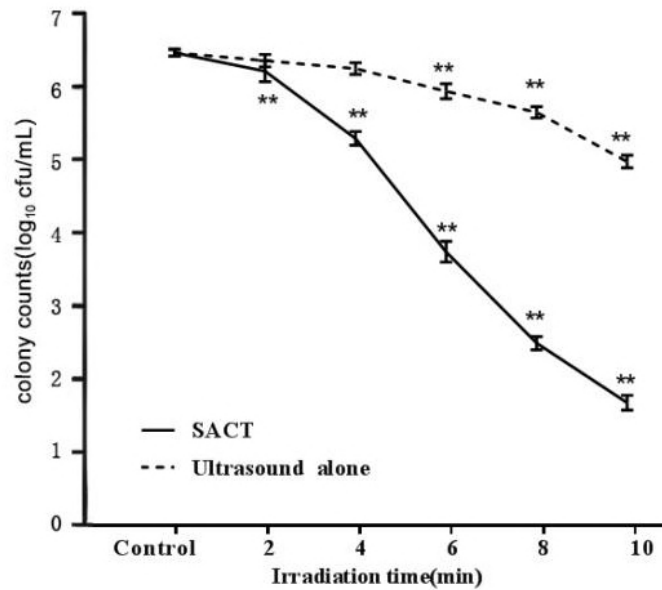

364

365 **Fig.2** Reduction in CFU after SDT with variation of ultrasonic irradiation time on Pg. Ultrasonic  
366 irradiation time ranged from 2 to 10 min were used in combination with 40 µg/ml HMME  
367 concentration and 3 W/cm<sup>2</sup> ultrasound intensity. Data represent mean values (n=10), and error bars  
368 represent standard deviations. \*\*P < 0.01 compared with the control group.

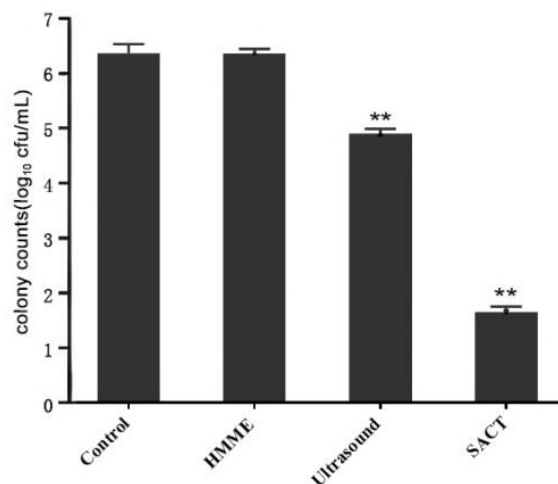

369

370 **Fig.3** Influence of HMME-mediated SDT on Pg growth. Groups consisted of samples incubated  
371 with 40 µg/ml HMME in the absence of ultrasound (HMME), irradiated with 3 W/cm<sup>2</sup> ultrasound  
372 intensity in the absence of HMME (Ultrasound), and without ultrasound and HMME treatment  
373 (Control), respectively. Data represent mean values (n=10), and error bars represent standard

374 deviations. \*\*P <0.01 compared with the control group.

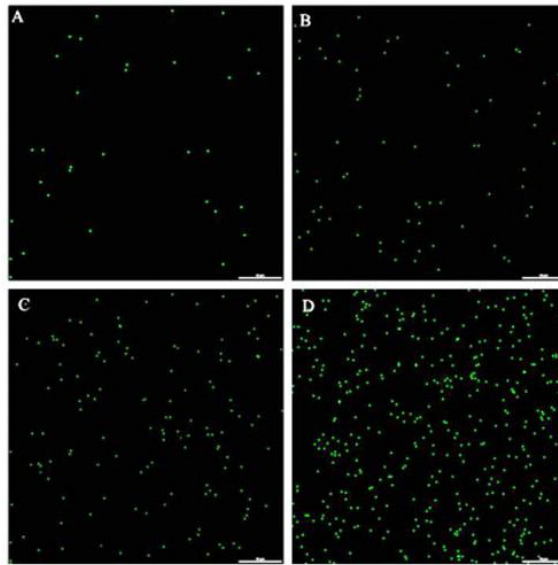

375

376 **Fig.4** Intracellular ROS production induced by SDT under a LSCM by DCFH-DA.

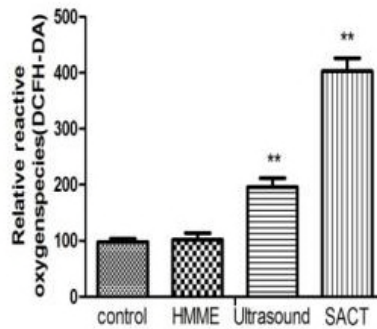

377

378 **Fig.5** Fluorescence intensity of ROS induced by SDT. Data represent mean values (n=3), and error

379 bars represent standard deviations. \*\*P <0.01 compared with the control group.

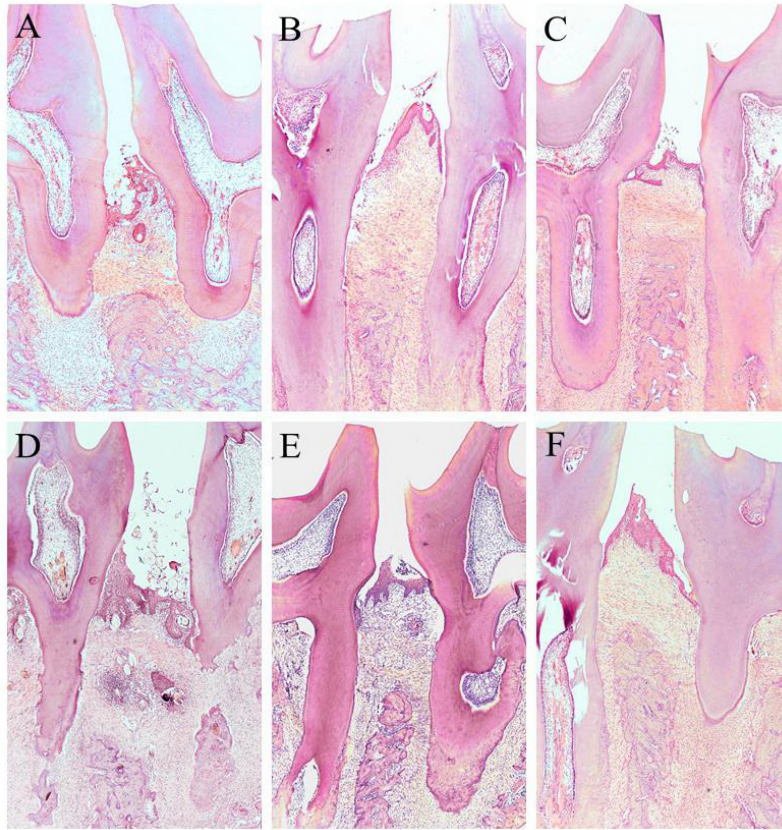

380

381 **Fig.6** Photomicrographs of bone tissue in the alveolar bone region between the first and second  
382 maxillary molars with induced periodontitis.

383 **Notes:** (A) ND group: no treatment as control at 10 days. (B) ND group: SRP treatment at 10 days.  
384 (C) ND group: SRP+SDT treatment at 10 days. (D) D group: no treatment as control at 10 days.  
385 (E) D group: SRP treatment at 10 days. (F) D group: SRP+SDT treatment at 10 days. (H&E;  
386 original magnification  $\times 4$ .)

387 **Table**

388 **Table 1** Glycemic level (mg/dL; mean  $\pm$  standard deviation) in different treatment and the distance  
389 between the CEJ and ABC (mm; mean  $\pm$  standard deviation) in the alveolar bone region between  
390 the first and second maxillary molars.

|  | ND group | D group |
|--|----------|---------|
|--|----------|---------|

| Treatment                     | control     | SRP        | SRP+SDT     | control      | SRP         | SRP+SDT     |
|-------------------------------|-------------|------------|-------------|--------------|-------------|-------------|
| n                             | 6           | 6          | 6           | 6            | 6           | 6           |
| Initial blood glucose (mg/dL) | 84.6±15.2   | 79.3±8.3   | 82.5±2.6    | 76.4±7.9     | 81.2±9.2    | 87.4±14.3   |
| 48 h blood glucose (mg/dL)    | 88.3±10.1   | 78.5±13.7  | 85.2±11.4   | 378.2±11.5*  | 388.3±7.7*  | 391.4±10.4* |
| Final blood glucose (mg/dL)   | 84.8±7.4    | 79.2±6.3   | 83.3±8.4    | 372.7±13.1*  | 390.8±10.5* | 397.6±11.0* |
| CEJ-ABC (mm)                  | 1.19±0.02*& | 0.94±0.05& | 0.56±0.01*† | 1.31±0.03*&† | 1.01±0.07&  | 0.67±0.02*† |

391 **Notes:** &Significant difference compared to SRP+SDT treatment (P<0.05; ANOVA and Tukey's  
392 tests). \*Significant difference between groups in the same treatment (P<0.05; ANOVA and Tukey's  
393 tests). †Significant difference compared to SRP treatment (P<0.05; ANOVA and Tukey's tests). The  
394 data is shown as means ± standard deviation, unless otherwise specified.
